# Supplementary material for: Decision processes in 3D structural MRI schizophrenia classification evaluated with saliency maps
Source: Research Square preprint supplement (doi:10.21203/rs.3.rs-6959156/v1), 2025-09-09
Supplement: Supplementary file 1 [file 40af7dde07d2ee6c96289e22.docx]

## **Supplementary Material to**

# **Decision processes in 3D structural MRI schizophrenia classification evaluated with saliency maps**

**Julia Jelitzki 12, Alexandra Reichenbach 12*+, and Alexander Windberger 3+**

1Center for Machine Learning, Heilbronn University, Heilbronn, Germany

2Medical Faculty Heidelberg, University of Heidelberg, Heidelberg, Germany

3Faculty of Informatics, Heilbronn University, Heilbronn, Germany

* corresponding author: alexandra.reichenbach@hs-heilbronn.de

+ these authors contributed equally to this work

**Keywords**: deep learning, schizophrenia, structural magnetic resonance imaging, explainable AI, Grad-CAM, saliency map

### **Images**


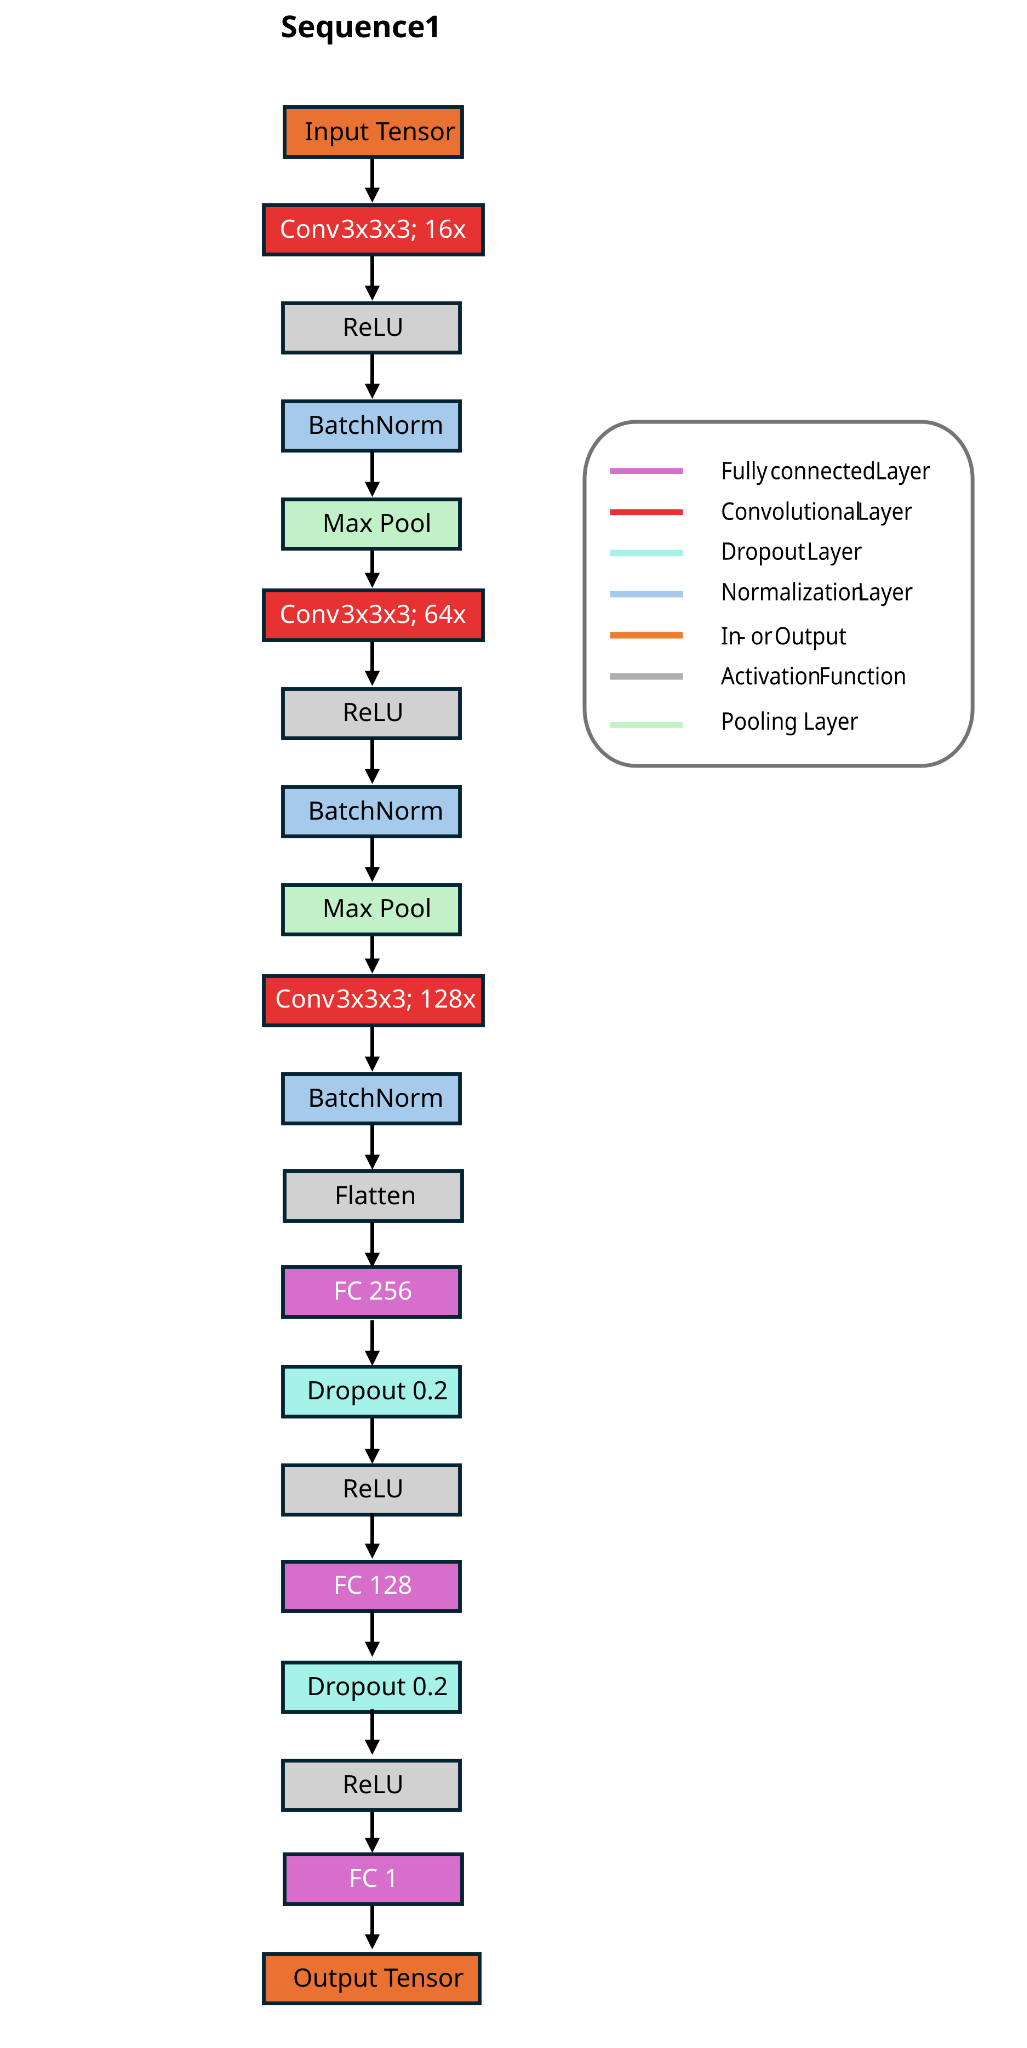


**Supplemental Figure 1:** Architecture depiction of Sequence 1 architecture.


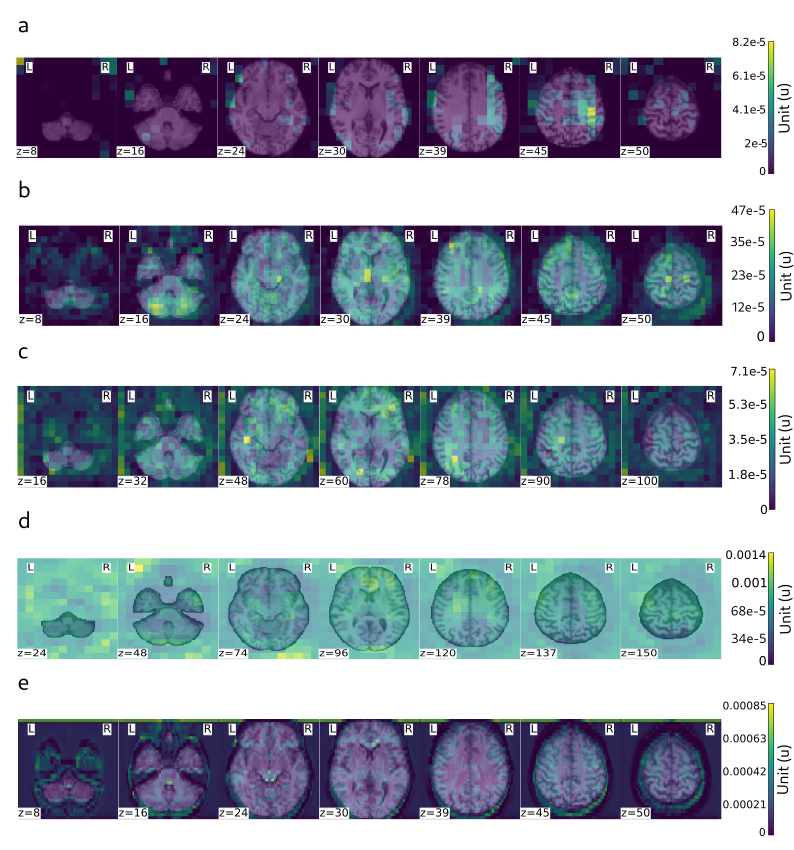


**Supplemental Figure 2:** Averaged saliency map of control class for the architecture types a) Sequence 1 b) OhNet c) Med3D d) RiekeNet e) MixedConv. Note that the architecture styles require different image resolutions.


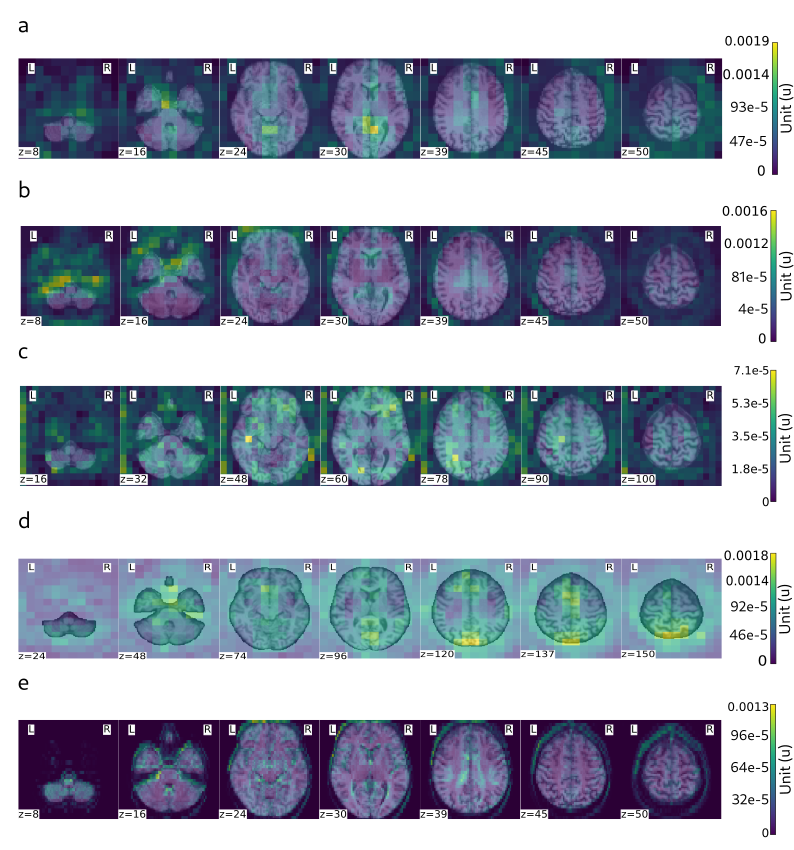


**Supplemental Figure 3:** Averaged saliency map of patient class for the architecture types a) Sequence 1 b) OhNet c) Med3D d) RiekeNet e) MixedConv. Note that the architecture styles require different image resolutions.

### **Tables**

| **Network Name** | **Input Size** | **Preprocessing** | **Pretrained Weights** |
| --- | --- | --- | --- |
| Sequence 1 | 64x64x64 | None | no |
| OhNet | 64x64x64 | None | no |
| Med3D10 | 128x128x128 | z-normalisation | yes |
| BrainID | 128x128x128 | rescale 0- 1 | yes |
| RiekeNet | 192x220x192 | z-normalisation | yes |
| Mixed Conv | 64x64x64 | rescale 0-1 z-normalisation | yes |
| ResNet18 | 64x64x64 | rescale 0-1 z-normalisation | yes |

**Supplementary Table 1.** Training details and additional image pre-processing procedures for every network architecture. All images were additionally prepared(skullstripped, MNI space registration, ect.) as declared in the [Data](#s37lmth0j34e) section.

| **Network Name** | **Lerningrate** | **Dropout** | **Weight Decay** | **Epochs** | **Pretrained Weights** |
| --- | --- | --- | --- | --- | --- |
| Sequence 1 | 0.00015 | 0.2 | 0.00001 | 25 | no |
| OhNet | 0.00007 | 0.2 | 0.01 | 20 | no |
| Med3D10 | 0.000005 | 0.35 | 0.01 | 20 | yes |
| BrainID | 0.00002 | 0.6 | 0.05 | 30 | yes |
| RiekeNet | 0.0009 | 0.15 | 0.01 | 20 | yes |
| Mixed Conv | 0.009 | 0.3 | 0.5 | 30 | yes |
| ResNet18 | 0.00094 | 0.3 | 0.05 | 30 | yes |

**Supplementary Table 2.** Overview of key network training parameters for all architecture types.
